# Supplementary material for: PTCH1 Gene Variants, mRNA Expression, and Bioinformatics Insights in Mexican Cutaneous Squamous Cell Carcinoma Patients
Source: MDPI journal article supplement (doi:10.3390/biology13030191), 2024-03-16
Supplement: s1 [file s1]

|                                              |                                              |                                             |                                               |                                                |
|----------------------------------------------|----------------------------------------------|---------------------------------------------|-----------------------------------------------|------------------------------------------------|
| 1<br>MASAGNAAEF<br>eeeeeebeee                | 11<br>QDRGGGSGC<br>eeeeeebeee                | 21<br>IGAPGRPAGG<br>eeeeeeeeeee             | 31<br>GRRRRRTGGLR<br>eeeeeeeeeee              | 41<br>RAAAPDRDYL<br>eeeeeeeeeeb                |
| 51<br>HRPSYCDAAF<br>eeeeebbbbb               | 61<br>ALEQISKGKA<br>bbeebbeeee<br>f f        | 71<br>TGRKAPLWLR<br>eeeebebbbe<br>f f       | 81<br>AKFQRLLFKL<br>bebeebbbbe<br>s f s s     | 91<br>GCYIQKNCGK<br>bbebeebbbe<br>ss sf fssf   |
| 101<br>FLVVGLLIFG<br>bbbbbbbbbb<br>s ss      | 111<br>AFAVGLKAAN<br>bbbbbbbbbb<br>s ssss s  | 121<br>LETNVEELWV<br>beeebeebbb<br>ff f s s | 131<br>EVGGRVSRRL<br>ebeeebeeb<br>f ffsf f    | 141<br>NYTRQKIGEE<br>eebeeeeeee<br>fs f fff    |
| 151<br>AMFNPQLMIQ<br>bbbbbebbbe<br>f ssf     | 161<br>TPKEEGANVL<br>eeeeeeebbb<br>f f s     | 171<br>TTEALLQHLD<br>bbbebeebbe<br>s f      | 181<br>SALQASRVHV<br>ebbeebbeeb<br>fs fs      | 191<br>YMYNRQWKLE<br>bbbeebbebe<br>s s         |
| 201<br>HLCYKSGELI<br>ebbeeeeeeb<br>s ffff    | 211<br>TETGYMDQII<br>beebbbeebb<br>f         | 221<br>EYLYPCLIIIT<br>eebbbebbbb<br>fs s    | 231<br>PLDCFWECAK<br>bbbeebbebe<br>ssf f f    | 241<br>LQSGTAYLLG<br>eebebebebe<br>f s         |
| 251<br>KPPLRWTFND<br>eeebbebbbe<br>f f       | 261<br>PLEFLEELKK<br>eeebbeebbe<br>f         | 271<br>INYQVDSWEE<br>beeebeebbe<br>f        | 281<br>MLNKAIEVGHG<br>bbbeebbebb<br>fs f s    | 291<br>YMDRPPCLNPA<br>bbbeebbebe<br>ss sf sf f |
| 301<br>DPDCPATAPN<br>eeebbeeeee<br>f sf f    | 311<br>KNSTKPLDMA<br>eeeeeeebbb<br>f         | 321<br>LVINGGCHGL<br>eebebebebe<br>s sfs ff | 331<br>SRKYMHWQEE<br>beebbebebe<br>s f s sfff | 341<br>LIVGGTVKNS<br>bbbebebebe<br>ss f        |
| 351<br>TGKLVSAHAL<br>eeebbbebbb<br>s ss      | 361<br>QTMFQLMTPK<br>ebbbebbbee<br>f fsssf   | 371<br>QMYEHFKGYE<br>eebebebebe<br>fs ff    | 381<br>YVSHINWNED<br>ebbebebebe<br>fsf        | 391<br>KAAAILAEAWQ<br>ebbbebbbebe<br>fs ssf sf |
| 401<br>RTYVEVHQS<br>eebbeebbeb<br>f          | 411<br>VAQNSTQKVL<br>beeeeeebbb<br>f f       | 421<br>SFTTTTLDDI<br>bbbebebeeb<br>sf sf fs | 431<br>LKSFSDVSVI<br>beebbebbbb<br>fss s      | 441<br>RVASGYLLML<br>ebbbebbbbbb<br>f sss ss   |
| 451<br>AYACLTMLRW<br>bbbbbbbbb<br>sssss sf   | 461<br>DCSKSQGAVG<br>ebeeeebbbb<br>fs fffsss | 471<br>LAGVLLVALS<br>bbbbbbbbb<br>s ss ss   | 481<br>VAAGLGLCSL<br>bbbeebbbb<br>ss fsssss   | 491<br>IGISFNAATT<br>beebbebbbe<br>f ssfsss    |
| 501<br>QVLPFLALGV<br>ebbbbbbbbb<br>fsss ssss | 511<br>GVDDVFLLAH<br>bbbebbbbbb<br>sssf s    | 521<br>AFSETGQNKR<br>bbbeeeeeee<br>sff      | 531<br>IPFEDRTGEC<br>bebeeeeb<br>f ffffs      | 541<br>LKRTGASVAL<br>beeebebbbb<br>s fffsf s   |
| 551<br>TSISNVTAF<br>bbbeebbbb<br>ss ff ss    | 561<br>MAALIPIPAL<br>bbbbbbbbb<br>sss ssf    | 571<br>RAFSLQAAVV<br>bbbeebbbb<br>s sf f    | 581<br>VVFNFAMVLL<br>bbbbbbbbb<br>s           | 591<br>IFPAILSMIDL<br>bbbbbbbbb<br>sss s ss    |

|                                                           |                                                                |                                                              |                                                               |                                                                |
|-----------------------------------------------------------|----------------------------------------------------------------|--------------------------------------------------------------|---------------------------------------------------------------|----------------------------------------------------------------|
| 601<br>YRREDRRLDI<br>e e e e e e e b e b<br>f f f f s s   | 611<br>FCCFTSPCVS<br>b b b b b b e b b e<br>s s                | 621<br>RVIQVEPQAY<br>e b b e b e e e e b                     | 631<br>TDTHDNTRYST<br>e e e e e e e e e e                     | 641<br>PPPPYSSHSF<br>e e e e e e e e e b                       |
| 651<br>AHETQITMQS<br>e e e b e b e b e e<br>s f f f f     | 661<br>TVQLRTEYDP<br>e b e b e e e b e e<br>f f                | 671<br>HTHVYYTTAE<br>e e e e b b b b b e<br>s                | 681<br>PRSEISVQPV<br>e e e e b e e e e e                      | 691<br>TVTQDTLSCQ<br>e e e e e e e e e e                       |
| 701<br>SPESTSSTRD<br>e e e e e e e b e e<br>f f f s f     | 711<br>LLSQFSDSSL<br>b b e e b e e e e e<br>s f                | 721<br>HCLEPPCTKW<br>e b e e e e b b e b<br>s                | 731<br>TLSSF AEKHY<br>e b b e b b e e e b<br>f s f s          | 741<br>APFLKPKAK<br>b e b b e e e e e e<br>s f s f f           |
| 751<br>VVVIFLFLGL<br>b b b b b b b b b b<br>s s s         | 761<br>LGVSLYGTTR<br>b b b b b e b b b e<br>s s f s s s        | 771<br>VRDGLDLTDI<br>b e e b b e b b b b<br>s f s s s s s s  | 781<br>VPRETREYDF<br>b e e e e e b e b<br>s f f f f s         | 791<br>IAAQFKYFSF<br>b e b e b e b b b b<br>s f s s            |
| 801<br>YNMYIVTQKA<br>b b b b b b e e e e<br>s s s         | 811<br>DYPNIQHLLY<br>e e e e b e e b b e<br>f f s              | 821<br>DLHRSFSNVK<br>e b e e b e e b e e<br>f s              | 831<br>YVMLEENKQL<br>b b b e e e e e b b<br>f s s             | 841<br>PKMWLHYFRD<br>e e b b b b b b e e<br>f s s              |
| 851<br>WLQGLQDAFD<br>b b e e b e e b b e<br>s s f s f     | 861<br>SDWETGKIMP<br>e e b e e b e b e e<br>f s                | 871<br>NNYKNGSDDG<br>e e e e e e e e e b<br>f f f f          | 881<br>VLAYKLLVQT<br>b b b b e b b b e e<br>s s s f s s f f   | 891<br>GSRDKPIDIS<br>e e e e e e e e b e<br>f f                |
| 901<br>QLTKQRLVDA<br>e b b e e e b b e e<br>f             | 911<br>DGIINPSAFY<br>e e b b b e e b b b<br>f                  | 921<br>IYLTAWVSND<br>b b b b b b b e e e<br>s s f f f        | 931<br>PVAYAASQAN<br>e b b b b b e e e e<br>f s s f f f f     | 941<br>IRPHRPEWVH<br>b e e e e e e e b e<br>f f f              |
| 951<br>DKADYMPETR<br>e e e e e e e e b b<br>f f f         | 961<br>LRIPAAEPIE<br>b e b e e e e e b e<br>s f f f f f        | 971<br>YAQFPFYING<br>e b e b b b b b e b<br>f f s s s s s    | 981<br>LRDTSDFVEA<br>b e e b b e b b e b<br>s s f s f         | 991<br>IEKVRTICSN<br>b e e b e b b b e e<br>s f f s f s f      |
| 1001<br>YTSLGLSSYP<br>b b e e e b e e e e<br>f f f        | 1011<br>NGYPFLFWEQ<br>e e e b b b b b e e<br>f f f s s s s f f | 1021<br>YIGLRHWLLI<br>b b e b b b b b b b<br>s s s s s       | 1031<br>FISVVLACTF<br>b b b b b b b b b b<br>s s s s s        | 1041<br>LVC AVFL LNP<br>b b b b b b b b b b<br>s s s s         |
| 1051<br>WTAGIIVMVL<br>b e b b b b b b b b<br>s f s s s s  | 1061<br>ALMTVELFGM<br>b b b b b b b b b b<br>s s s s s s s     | 1071<br>MGLIGIKLSA<br>b b b b b b e b e b<br>s s s s f s f s | 1081<br>VPVVILIASV<br>b b b b b b b b b b<br>s s s s s s s s  | 1091<br>GIGVEFTVHV<br>b b b b e b b b b b<br>s s s s f s s s s |
| 1101<br>ALAF LTAIGD<br>b b b b b b b b e e<br>s s s s s f | 1111<br>KNRR AVL ALE<br>e e e e b b b b b e<br>f s s f         | 1121<br>HMFAPVLDGA<br>e b b b b b b b e b<br>f s s s s s f s | 1131<br>VSTLLGVLM L<br>b b b b b b b b b b<br>s s s s s s s s | 1141<br>AGSEFDFIVR<br>b b b e b e b b b e<br>s s s f s f s s   |
| 1151<br>YFFAVLA ILT<br>b b b b b b b b b b<br>s s s s s   | 1161<br>ILGV L NGLVL<br>b b b b b e b b b b<br>f s s           | 1171<br>LPV LLSFFGP<br>b b b b b e b b e e<br>s s f f        | 1181<br>YPEVSPANGL<br>e e e e e e e e e e                     | 1191<br>NRLPTPSPEP<br>e e e e e e e e e e                      |
